1 **Active modulation of Hydrogen bonding by sericin enhances**  
2 **cryopreservation outcomes**

3

4 L. Underwood, J. Solocinski, E. Rosiek, Q. Osgood, N. Chakraborty

5

6

7

8

9

10

11

12

13

14

15

16 **Abstract:**

17 Cryopreservation of cells without any toxicity concerns is a critical step in ensuring  
18 successful clinical translation of cell-based technologies. Mitigating the toxicity concerns  
19 related to most of the commonly used cryoprotectants including dimethyl sulfoxide  
20 (DMSO) is an active area of research in cryobiology. In recent years use of additives  
21 including polymeric proteins such as sericin have been explored as an additive to  
22 cryoprotectant formulations. In this study the thermophysical effect of addition of sericin  
23 was investigated. The effect of presence of sericin on the H-bonding strength was  
24 investigated using Raman microspectroscopy and other thermophysical effects were  
25 quantified using differential scanning calorimetry (DSC) techniques. Finally, the  
26 prospect of using sericin as an additive to cryoprotectant formulation was investigated  
27 by monitoring cellular viability and growth following exposure to cryogenic temperatures  
28 in hepatocellular carcinoma cells. Results indicate significant improvement in post-thaw  
29 viability when sericin is used as an additive to DMSO based formulations. While use of  
30 trehalose as an additive has beneficial effects by itself, combined usage of sericin and  
31 trehalose as additives did result in an improved overall long-term growth potential of the  
32 cells.

### 33 **Statement of Significance**

34 This study provides for powerful biophysical understanding of how sericin can be used  
35 as an additive for cryoprotectant solutions, which allows storage of biologics at low  
36 temperatures. It is desirable to replace current components of cryoprotectant  
37 formulation (such as DMSO) due to innate toxicity and metabolic derangements to cells.  
38 The ability of sericin to improve cryoprotective solutions was mechanistically  
39 characterized by Raman microspectroscopy, which allows for molecular level  
40 characterization of the nature of H-bonding in aqueous environments in presence of  
41 solution components. Thermodynamic analysis of the cryoprotectant solutions  
42 containing sericin was undertaken to quantify the relation between solution composition  
43 and cryopreservation outcome. This analytical study provides a basis for designing  
44 better cryoprotectants with lower thermophysical injury and higher cellular yields.

45

## 46 **Introduction**

47 Cell preservation technologies can play an extremely important role in  
48 transitioning cell-based techniques from laboratory to bedside. Such translation of cell-  
49 based technologies require development of highly optimized and efficient long-term  
50 preservation strategy for cells. In general, long-term preservation of cells and cellular  
51 materials is achieved through formation of a glassy matrix [1, 2] at low temperatures in  
52 presence of cryoprotective agents (CPAs). This glassy matrix has been hypothesized to  
53 reduce molecular mobility and prevent degradative intracellular reactions at low storage  
54 temperatures [3]. Dimethyl sulfoxide (DMSO) is one of the most commonly used CPAs  
55 in slow cooling rate cryopreservation techniques [4, 5]. However, use of DMSO has  
56 been frequently and closely associated with cellular toxicity effects and poor post-thaw  
57 performance [6-8].

58 While there are very few credible alternatives to DMSO, at high concentrations  
59 (>10%) DMSO has been shown to be toxic to cells as it is known to take part in  
60 formation of lipid membranes pores [9] and other irreversible membrane damage. This  
61 characteristic has been well-studied in the context of drug delivery development  
62 strategies [10]. Even at low concentrations, exposure to DMSO (<4% v/v) has recently  
63 been linked to irreversible cellular damage, as it has been shown to initiate apoptosis in  
64 retinal neuronal cells [6]. In another study, exposure to 1% v/v DMSO levels did not  
65 produce any evidence of cell death, but there was significant mitochondrial damage due  
66 to increased levels of reactive oxygen species (ROS) following 24-hour exposure [11].  
67 This leads to mitochondrial swelling and significant membrane potential impairment [12].  
68 A recent study indicates that exposing human tissue to 0.1% v/v levels of DMSO causes

69 drastic changes to human intercellular processes and the overall epigenetic landscape  
70 by impacting DNA methylation and down regulating microRNAs [13]. All of these  
71 studies suggest the need to revisit the optimal use of DMSO in CPA formulations.

72 Use of additives that can actively modulate the cryopreservation outcome in CPA  
73 formulations is a commonly accepted strategy. Several disaccharides, including  
74 trehalose and sucrose [14-16], glycerol [15], and proline [17, 18] have been used as  
75 additives to DMSO-based CPA formulations. The effect of using additives to DMSO  
76 based CPA formulations can vary and range from being biophysical to biochemical in  
77 nature. For example, when trehalose is used as an additive, it can play a cryoprotective  
78 role by reducing ice crystal size and thereby discourage the formation of harmful ice  
79 crystal patterns during cryopreservation. Such an effect on crystal formation was found  
80 to have a direct positive impact on cellular viability and post-thaw metabolism following  
81 cryopreservation [19]. The study also revealed the delicate balance that is needed to  
82 avoid the two principal cryogenic injury paradigms while formulating CPAs [4]. While on  
83 one hand addition of an additive can reduce intracellular ice formation (IIF), an increase  
84 in concentrations beyond a threshold can lead to increased osmotic stress and  
85 decreased viability. Additives may also exert their cytoprotective effect by various  
86 biochemical means. During slow-cooling rate ( $<10^{\circ}\text{C}/\text{min}$ ) cryopreservation, cells are  
87 generally exposed to hyperosmotic CPA solutions for several minutes before  
88 extracellular crystallization occurs [4, 20, 21]. Several osmolytes, such as proline [22]  
89 and certain anti-apoptotic agents [23, 24] have been shown to play a biochemical role in  
90 avoiding osmotic injury during slow-cooling rate cryopreservation.

91 In this study, the effect of using the polymeric protein sericin as a non-penetrating  
92 CPA was investigated. Sericin is a protein used by *bombyx mori* (silkworms) in the  
93 production of silk. Sericin acts as an adhesive coating to the fibers and has anti-oxidant  
94 properties [25]. Clinically, sericin shows promise as a protective molecule against  
95 several types of cellular stresses. Multiple studies have reported sericin's ability to  
96 mitigate oxidative stress in various tissue types and proposed use of sericin as a  
97 replacement for animal origin serum in cell culture [26, 27]. It has been already been  
98 used as a serum replacing agent in CPA formulations for several different types of  
99 mammalian cells including human adipose tissue-derived stem cells [28], myeloma cell  
100 lines, fibroblasts, keratinocytes, insect cell lines [29], rat insulinoma cell lines, mouse  
101 hybridoma cell lines and mesenchymal stem cells [30].

102 Due to the polymeric nature of the protein, sericin can form extensive hydrogen  
103 bonding (H-bonding) in the matrix [31] and thus can play an important role in creating  
104 low-molecular mobility environment at low temperatures [32]. H-bonding can be used to  
105 impact the nature of the glass formation by modulating the nature of H-bonds formed  
106 [33] and the H-bonding strength plays a critical role in this regard. In this study an  
107 investigation was undertaken to characterize the effect of sericin as an additive to  
108 DMSO based CPA formulation. Special emphasis was given in gaining understanding of  
109 the effect of addition of sericin in aqueous environment on H-bonding strength using  
110 Raman microspectroscopy. Thermophysical properties of CPA formulations containing  
111 different concentrations of sericin were characterized using differential scanning  
112 calorimetry and these properties were likened to the cryopreservation outcome of  
113 human hepatocellular carcinoma cells (HepG2) in terms of cellular survival and growth.

114 The studies performed here provide a framework for biophysical criteria required  
115 towards development of low-toxicity CPA formulations that can be used in highly  
116 optimized long-term preservation techniques under clinical settings.

## 117 **Materials and Methods**

### 118 *Raman microspectroscopic analysis of hydrogen bonding of cryoprotective solutions:*

119 The thermo-molecular effect of addition of sericin in the CPA formulation was  
120 investigated by quantifying H-bonding characteristics and strengths at different  
121 temperatures and concentrations using Raman microspectroscopy. In doing so, special  
122 emphasis was given to the OH stretching region that can be used to understand the  
123 effect of H-bonding in aqueous solutions. Raman spectral measurements were  
124 performed using a customized confocal microscope Raman spectrometer (UHTS 300,  
125 WITec Instruments Crop, Germany). A 532-nm solid-state laser system was used for  
126 photonic excitation. Spectral signatures were collected using a 10X objective (Zeiss,  
127 Thornwood, NY) and an EMCCD camera (Andor Technology, UK). A liquid nitrogen-  
128 cooled low temperature stage (FDCS 196, Linkam Scientific Instruments, UK) was used  
129 to control sample temperatures. The temperature-controlled stage was mounted on the  
130 Raman microscope stage using custom-made stage adaptors.

131 For each experiment, 300  $\mu$ L of solution was added to a quartz crucible and  
132 placed inside the freezing stage. Samples were initially cooled to 0°C then warmed in  
133 5°C increments and allowed to stabilize at each temperature point until reaching 20°C; a  
134 heating/cooling rate of 10°C/min was used. Spectra were gathered at each temperature  
135 point using an integration time of 1 s, averaged over 60 accumulations. Following  
136 collection, background spectra was subtracted, and cosmic ray interference were

137 removed. Spectral peaks were deconvoluted and analyzed using Origin Pro 2018  
138 (OriginLab, Northampton, MA).

139 A customized chemometric deconvolution algorithm based on Fast Fourier  
140 Transform (FFT) of Raman signal is used to decompose the OH stretching regions of  
141 the CPA formulations [34, 35]. The deconvolution is computed using the formulation

$$f = \text{fft}^{-1} \left[ \frac{\text{fft}(y)}{\text{fft}(s)} \right]$$

142 where  $y$  is the known response of the signal  $s$ . While several different peaks can be  
143 identified in the OH stretching region (Fig. 1A) that are related to the physical state of  
144 the water and H-bonding, two principals peaks related to symmetric ( $\sim 3200 \text{ cm}^{-1}$ ) and  
145 asymmetric ( $\sim 3415 \text{ cm}^{-1}$ ) vibrations were considered here for the analysis related to H-  
146 bonding. The higher-frequency asymmetric spectral component is known to be related  
147 to the water molecules bound by incompletely formed H-bonding [36]. Whereas, the  
148 lower-frequency symmetric component corresponds to the molecules with complete  
149 tetrahedral H-bonded structure [37, 38].

150 The experimentally obtained spectral intensity of the symmetric and asymmetric  
151 peaks in the OH stretching region were then used to estimate the enthalpy and entropy  
152 of the formation of hydrogen bonds in aqueous CPA formulations containing sericin as  
153 additives. Van't Hoff equation was used to relate enthalpy change and the equilibrium  
154 constant of reaction for CPA solutions [39, 40]. A van't Hoff plot (Fig. 2A) was  
155 constructed as the linear dependence of  $\ln(k)$  against the inverse of the temperature ( $T$ ).  
156 The enthalpy ( $\Delta H$ ) of bonding is was expressed as a product of the slope of the Van't  
157 Hoff plot and universal gas constant. The equilibrium constant ( $k$ ) in this case is also



158 equal to the ratio of the intensities of these individual peaks resolved in Raman  
159 spectrum at different temperatures (T). [41]

$$\ln(k) = \frac{-\Delta H^\circ}{R} \cdot \frac{1}{T} + const$$

160 Here R is the universal gas constant, and  $\Delta H^\circ$  is the change in enthalpy during the  
161 formation of one mole of hydrogen bonded molecules from nonbonded ones under  
162 standard conditions of 298 K and 1 atm. The change in enthalpy (Fig. 2B) and entropy  
163 (Fig. 2C) was used to quantify the change in characteristics of H-bonding strength in  
164 aqueous solutions having varying concentrations of sericin.

165 In addition to the H-bonding characterization using intensities of the symmetric  
166 and asymmetric peaks in the OH stretching region of the Raman spectra, change of  
167 peak position (peak shift) was also used to analyze energetics related to H-bonding.  
168 The trend in peak-shift characteristics were quantified by comparing the change in  
169 peak-center per unit temperature for both symmetric ( $n_1$ ) and asymmetric peaks ( $n_2$ , as  
170 seen in Fig. 3A and B). This analysis indicates the variation in H-bonding energetics at  
171 different temperatures in presence of sericin.

172

173 *Differential scanning calorimetry (DSC) for determining thermodynamic properties:*

174 The effect of addition of an additive to the CPA formulation was analyzed using  
175 DSC. Properties including freezing point, melting point, and heat of fusion was  
176 quantified using DSC. DSC measurements were performed using a precise  
177 temperature-controlled microscopy stage and a temperature controller (FDSC 600,  
178 Linkam Scientific Instruments, Tadworth, UK). Calibration of the system was performed  
179 using indium as described in ASTM E968 ([41] - Data not shown). CPA formulations

180 containing trehalose and sericin as additives were analyzed. Thermodynamic  
181 characteristics of DMSO and sericin solutions were compared to each other (Fig. 5).  
182 The thermodynamic characteristics for 5% and 10% DMSO (v/v) in presence of  
183 additives were also compared (Fig. 6). Freezing/melting data was procured at 1°C/min  
184 until stabilized after freezing. Samples were heated at 1°C/min until stable after melting.  
185 The freezing point and melting point were considered as the temperatures at which  
186 maximum heat flow occurred during the phase change process. Enthalpy of freezing  
187 was determined by measuring the area under the curve of the thermogram. Energy data  
188 was normalized to the mass of the solution added to the DSC chamber. All thermogram  
189 data were analyzed using Origin Pro 2018.

190

#### 191 *Cell culture, Cryopreservation and growth:*

192 Human hepatocellular carcinoma (HepG2) cells were obtained from the  
193 American Type Culture Collection (Manassas, VA), and grown in 75 cm<sup>2</sup> culture flasks  
194 (Corning Inc, Corning, NY). Opti-MEM (Gibco) culture media was supplemented with  
195 5% fetal bovine serum (FBS) (Gibco) and penicillin-streptomycin to yield final 100  
196 units/mL penicillin G and 100 µg/mL streptomycin sulfate (Hyclone-Thermo Scientific,  
197 Logan, UT). Cells were incubated in an atmosphere of 5% CO<sub>2</sub> and 95% air. The cells  
198 were collected using trypsinization followed by centrifugation and resuspended in 1 mL  
199 of cryoprotective solution in individual microtubes. A passive freezing container capable  
200 of controlling the cooling rate at 1°C/min (Cool Cell LX, 137 Biocision, Menlo Park, CA)  
201 was used to store samples in cryogenic conditions. After exposing the cells to cryogenic  
202 conditions for pre-determined duration, cells were thawed quickly in a using a 37°C

203 water bath and re-suspended in fully complemented cell culture medium. Cell numbers  
204 were quantified using hemacytometer (Hausser Scientific, Horsham, PA) counts and  
205 membrane integrity was assessed using trypan blue exclusion. Following the initial  
206 viability count, cells were put into 25 cm<sup>2</sup> flasks for the grow out. Each thawing condition  
207 had 3 separate flasks to be counted on days 3, 5, and 7. Cells were counted using the  
208 hemacytometer-trypan blue exclusion.

209

## 210 **Results**

### 211 *Raman microspectroscopy:*

212 The effect of the presence of sericin on the H-bonding strength was investigated  
213 using Raman microspectroscopy. Fig. 1A and B shows the representative Raman  
214 spectrum of pure water at 20°C and -10°C. An FFT based chemometric algorithm was  
215 used to deconvolute the OH stretching region (~2800-3800 rel. cm<sup>-1</sup>). Among the  
216 identified peaks, symmetric and asymmetric OH stretching peaks (peaks 1 and 2  
217 respectively) were used to quantify the H-bonding characteristics in the solution state  
218 [38, 39]. The intensity variations in the deconvoluted peaks with different temperatures  
219 indicate relative changes in the nature of H-bonding with water and its neighboring  
220 molecules [37]]. Fig. 1C plots the maximum intensities of the symmetric and asymmetric  
221 peaks from -10°C to 20°C. With the increase in temperature, symmetric bonding  
222 intensity decreases linearly, while increasing the asymmetric bonding intensity. As  
223 temperature decreases, the symmetric peak intensities increase due to increase in  
224 number of central H<sub>2</sub>O molecules completely bound by its nearest neighbors. An

225 opposite effect is observed for the asymmetric peak which is associated with the  
226 incompletely H-bonded clusters of water molecules in the solution.

227

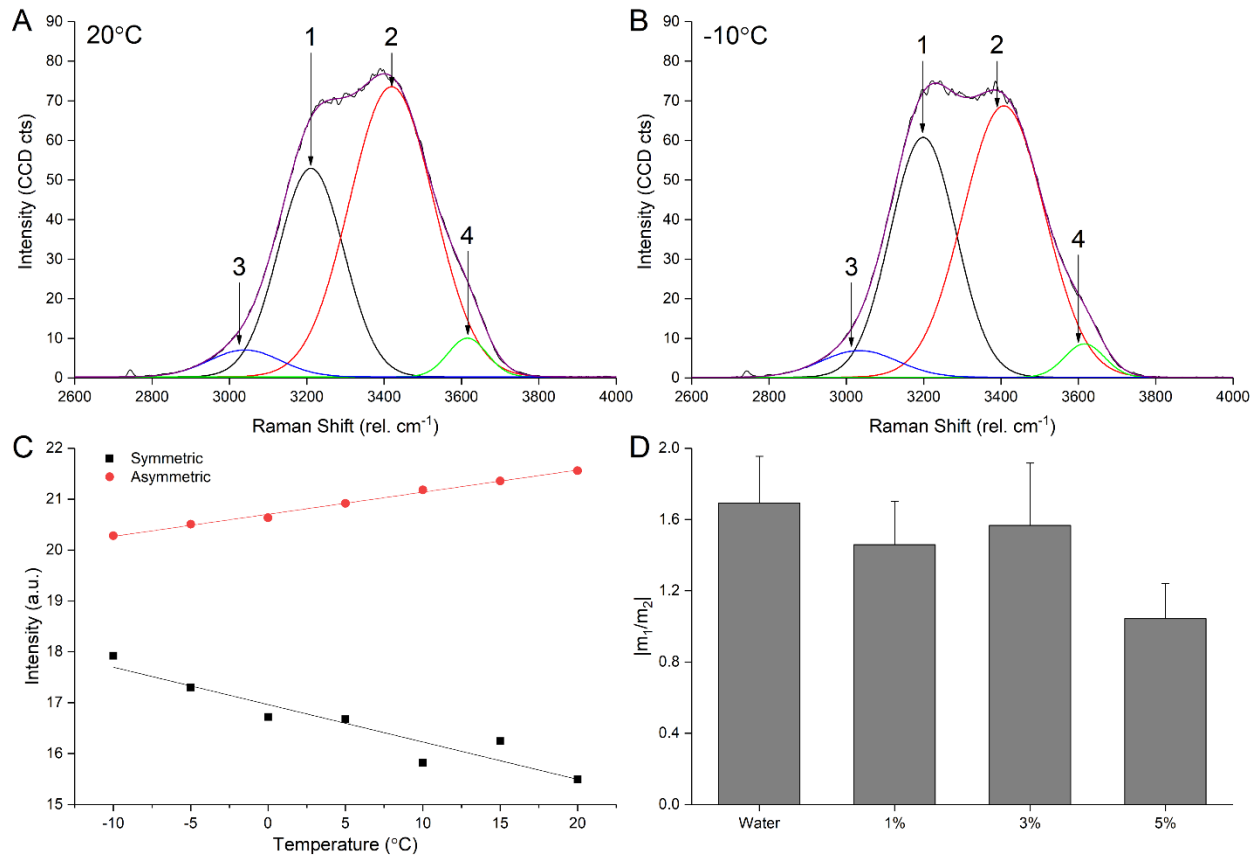

228

229 Figure 1: Raman spectroscopy of binary water-sericin solutions A) OH-stretching  
230 band ( $\sim 2900-3700 \text{ cm}^{-1}$ ) of pure water at  $-10^\circ\text{C}$ . Spectrum is deconvoluted into four  
231 primary bands and the reconstructed spectrum is superimposed on the original to show  
232 agreement of fit. Arrows 1 and 2 indicate symmetric and asymmetric peaks respectively.  
233 B) OH-stretching band of pure water at  $20^\circ\text{C}$ . C) Symmetric and asymmetric peak  
234 intensities are plotted at the corresponding temperatures at which Raman scans were  
235 acquired for pure water. Linear fits are calculated for both sets of data with  $R^2 \geq 0.9$

236 (sym) and 0.995 (asym). D) The ratio of slopes,  $m_1$  to  $m_2$ , was calculated for different  
237 sericin concentrations in water. Error bars represent SEM of slope fit.

238

239 Presence of an additive to influence the H-bonding characteristics at low  
240 temperatures can thus be quantified by comparing the pattern of increase (or decrease)  
241 in peak intensities in OH stretching regions as shown in Fig. 1C. At lower temperature  
242 this variation in overall strength of H-bonding in water clusters can be represented by  
243 the slopes of the fitted trends ( $m_1$  and  $m_2$ ). Fig. 1D plots the ratio of  $m_1$  and  $m_2$  for  
244 different concentrations of sericin in water (1-5% w/v). Sericin in higher concentrations  
245 is shown to decrease the contribution of incomplete water clusters and increase the  
246 overall number of strongly H-bonded water clusters at lower temperatures (Fig 1D). At  
247 higher concentration of 5% sericin, there appears to be a significant increase in rate of  
248 change in asymmetric peak intensity with temperature. In addition to the change in  
249 number of H-bonded water clusters, the functional OH groups on sericin molecules may  
250 be a contributing factor to the intensity variation in asymmetric peak intensity.

251 In order to understand the thermodynamic effect of presence of sericin molecules  
252 in water, a Van't Hoff analysis was performed. Change in the enthalpy of water-sericin  
253 binary solutions relative to the enthalpy values of water was created based on Van't  
254 Hoff plots (Fig. 2B). The change in enthalpy (Fig. 2B) and entropy (Fig. 2C) was used to  
255 quantify the change in the number of H-bonded water clusters in aqueous solutions  
256 having varying concentrations of sericin. Shift in the pattern of enthalpy change with  
257 temperature in presence of sericin can be attributed to alteration of H-bonded water  
258 clusters. With the addition of 1% sericin, a 64% decrease in enthalpy related to H-

259 bonding. However, such dramatic depression is not observed at higher concentrations  
260 leading to significant decrease in  $\Delta H$  values in the solutions containing higher  
261 concentrations of sericin. The entropy of reaction ( $\Delta S$ ) was formulated as a product of  
262 the y-intercept of the Van't Hoff plot and universal gas constant. When compared with  
263 the entropy of reaction in comparison to water, a similar trend as observed with the  
264 enthalpy values is observed (Fig. 2C). Fig. 2D indicates the isokinetic relationship  
265 obtained from the ratio of the entropy and enthalpy of the sericin solutions at different  
266 temperatures.

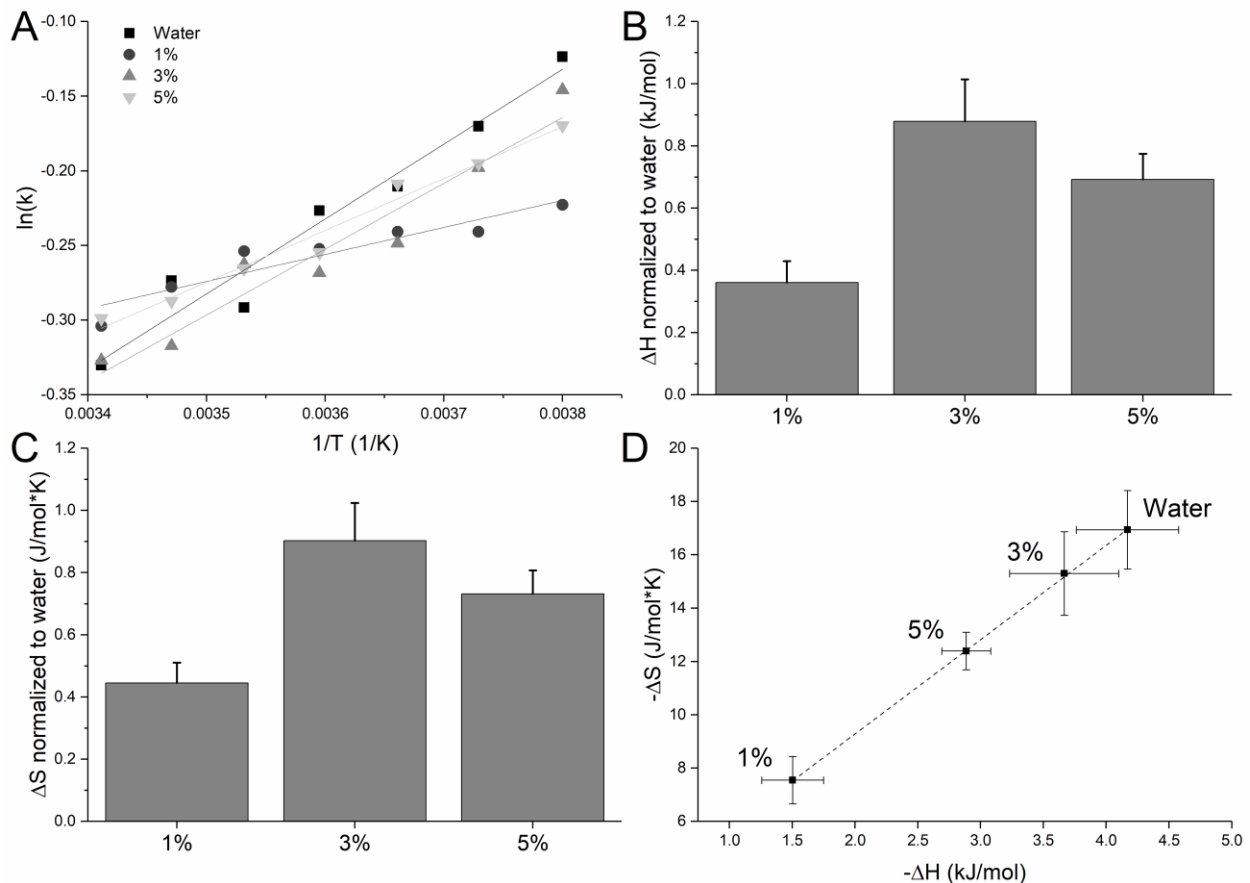

267

268

269 Figure 2: Raman spectroscopic thermodynamic analysis: A) Van't Hoff plots for water-  
270 sericin solutions,  $k$  represents ratio between symmetric and asymmetric intensity. B)

271 Change in the enthalpy of water-sericin binary solutions based on Van't Hoff plots,  
272 normalized to pure water. \* $p < 0.05$ . C) Change in the entropy of water-sericin binary  
273 solutions normalized to pure water. \* $p < 0.05$ . D) Linear fit of change in enthalpy against  
274 change in entropy for water-sericin binary solutions. Error bars show  $\pm$ SEM,  $n=3$

275

276 In addition to the spectral peak intensities in the OH stretching region, the  
277 spectral shift of the symmetric and asymmetric peaks is also related to the energetics  
278 related with the in H-bonding characteristics [34, 42]. Fig. 3A and 3B indicate the peak  
279 shift patterns related to symmetric and asymmetric peaks respectively at different  
280 temperatures between 20°C to -10°C. Figures 3C and 3D show the difference in peak-  
281 shift characteristics between the temperatures 20°C and -10°C for both symmetric and  
282 asymmetric peaks. It is interesting to note that the solution containing 1% sericin  
283 presents a significantly different trend indicating significantly reduced peak-shift  
284 characteristics for both symmetric and asymmetric peaks. At higher temperatures the  
285 symmetric peaks show a minor trend of peak shift towards lower wave numbers with  
286 increase in sericin concentration (Fig. 3C). However, no such trend is observed for the  
287 asymmetric peak shift (Fig. 3D). At lower temperatures, addition of 1% sericin causes  
288 the symmetric peak to move towards higher wavenumbers, while with the increase in  
289 sericin concentration the trend is reversed. Similar trend is observed for the asymmetric  
290 peak at lower temperature indicating unique trend in H-bonding strength at 1% sericin  
291 concentration.

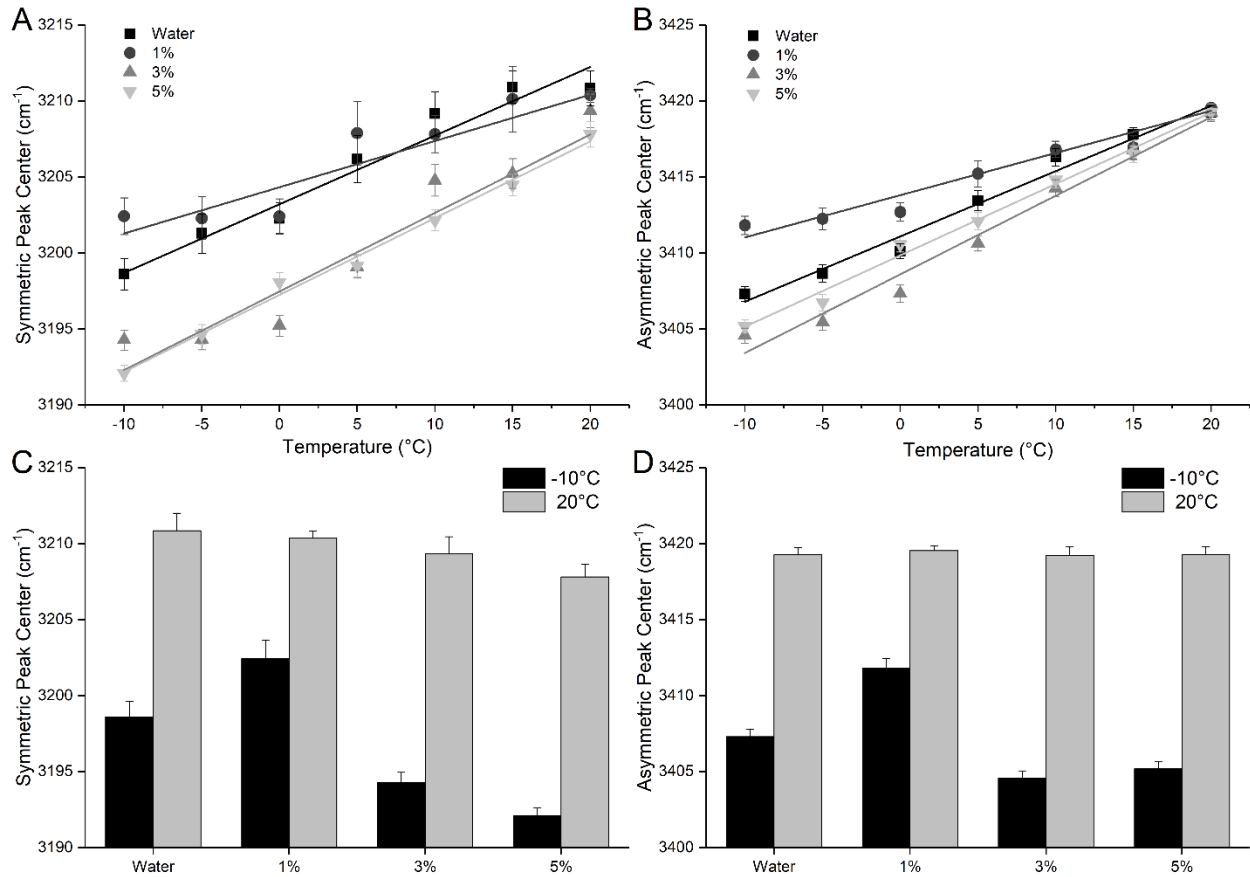

292

293

294

295

296

297

298

299

300

301

302

303

Figure 3: Peak center shift of OH stretching bands A) Symmetric peak center is plotted for water-sericin solutions at temperatures ranging from -10°C to 20°C. A noticeable difference in slope can be observed for the 1% sericin solution. B) Asymmetric peak center plotted for the same solutions and temperatures as (A). As temperature increases, peak center converges asymmetric peak center converges at 3417 cm<sup>-1</sup>. This indicates equal asymmetric hydrogen bonding at higher temperature. C) Symmetric peak center values for various water-sericin solutions at -10°C and 20°C. At low temperature, there are significant differences between the peak center values of the solutions. There is a slight trend towards lower frequency peak centers as sericin increases at higher temperature. D) Asymmetric peak center values for water-sericin solutions. At low temperature, peak center shift follows a similar trend as the symmetric.



304 At high temperature, there is no change between the peak center value. This shows  
305 sericin's ability to modulate hydrogen bonding (either stronger or weaker) as  
306 temperature is decreased toward freezing. Error bars show  $\pm$ SEM,  $n=3$

307

308 When the peak-shift characteristics for both symmetric and asymmetric peaks  
309 are compared against each-other ( $n_1/n_2$ ), there are no appreciable difference between  
310 any of the trends compared for any of the solutions including pure water (Fig. 4A).  
311 When the slopes of the trend in peak shifts as observed in Fig. 3A and 3B were  
312 normalized against the trend in peak shift exhibited by pure water, the peak shift  
313 characteristics of 1% sericin solution appear to be significantly different for both  
314 symmetric and asymmetric peaks (Fig. 4B and 4C).

315

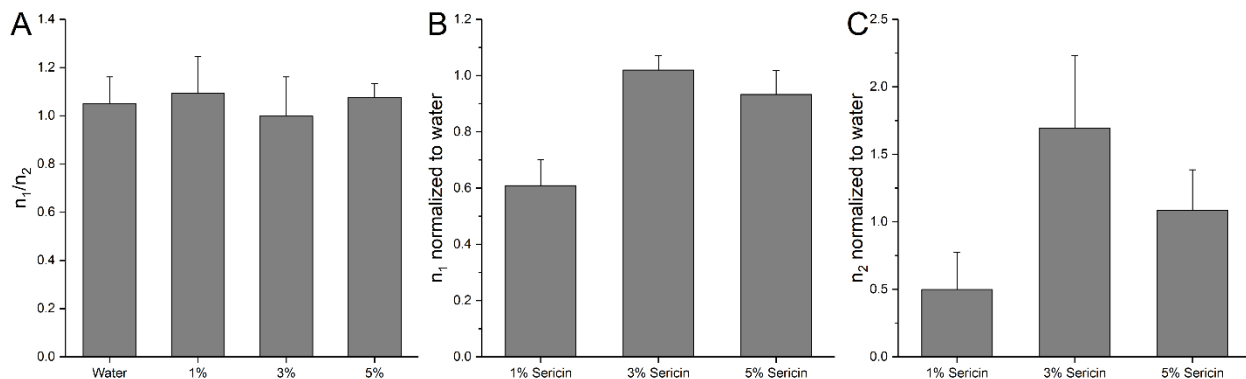

316

317 Figure 4: Raman OH stretching band shift hydrogen bonding analysis A) The  
318 ratio of symmetric and asymmetric slopes for water-sericin solutions. There is no  
319 statistically significant difference between the four solutions, indicating equal shift with  
320 respect to temperature for all solutions. B) The ratio of sericin solution symmetric slope  
321 over pure water slope. The normalized slope is significantly lower for the 1% solution  
322 indicating less change in hydrogen bonding as temperature is decreased. \* $p<0.05$ . C)

323 Similar slope comparison as in (B), here for asymmetric slope. Significantly lower  
324 normalized slope for 1% sericin solution indicates lower H-bonding. Error bars show  
325  $\pm$ SEM, n=3

326

### 327 *Differential Scanning Calorimetry Studies*

328 A comparative analysis was undertaken to evaluate thermodynamic responses of  
329 CPA formulations containing DMSO, trehalose and sericin using standard DSC  
330 techniques. Fig. 5A indicates trends in freezing point depression in CPA formulations  
331 containing 100 mM trehalose in sericin and DMSO. The trends were compared to the  
332 freezing point depression trend observed in CPA solutions containing DMSO only.  
333 These thermodynamic responses were collected at varying concentrations of DMSO  
334 and sericin. Addition of 100 mM trehalose results in significant decrease in freezing  
335 point depression characteristics when compared to DMSO-water binary solutions.  
336 Sericin-water binary solutions indicate the same initial trend, however exhibit much  
337 lower levels of freezing point depression characteristics when directly compared with  
338 DMSO-water binary system. Addition of 100 mM trehalose to sericin based solutions  
339 leads to even further reduction in trend indicating a collaborative effect of sericin and  
340 trehalose.

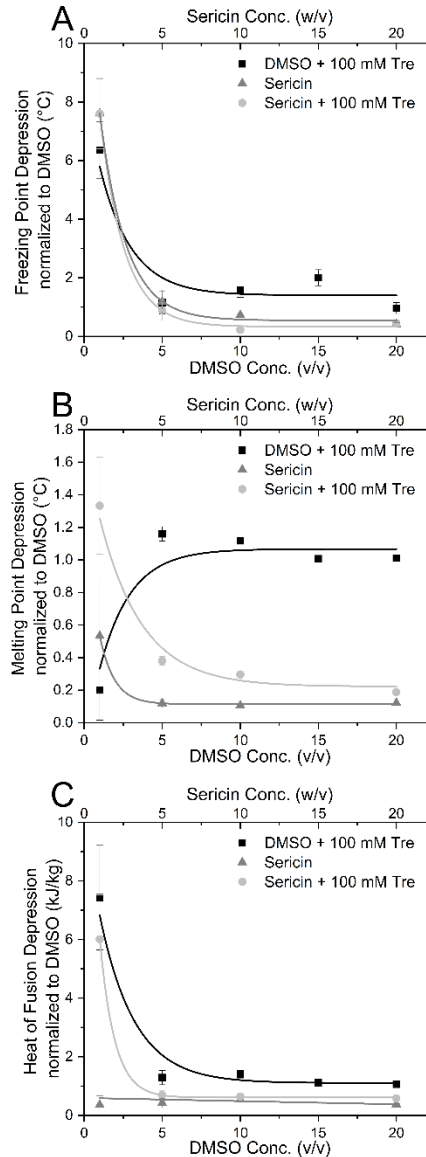

341

342 Figure 5: DSC analysis of individual CPA constituents A) Thermodynamic  
343 parameters were acquired for solutions with varied CPA compositions. Solutions were  
344 created with concentrations of 0-20% of DMSO (v/v) or sericin (w/v). These solutions  
345 were also analyzed with an addition of 100 mM trehalose. All parameters were  
346 normalized to DMSO solutions at equal concentrations. Freezing point depression had  
347 large immediate increases for all conditions, DMSO had more significant effects at the  
348 highest concentrations. B) All solutions had increasing melting point depression with

349 increased CPA concentration. C) Heat of fusion depression had similar trends as  
350 melting point depression, but with DMSO and sericin solutions having closer  $m$  values.  
351 Error bars show  $\pm$ SEM,  $n=3$ .

352

353 Fig. 5B indicates the trends in melting point depression in CPA formulations.  
354 Upon comparing the trends in melting point depression with DMSO-water binary  
355 solutions, one can observe that at 1% concentration the addition of 100 mM trehalose  
356 significantly decreases the melting point depression. Solutions with a concentration of  
357 5% DMSO and above containing 100 mM trehalose as additive show similar melting  
358 point depression trend to DMSO-water binary solutions, however trehalose has little  
359 effect when DMSO concentration is above 15%. Both sericin based solutions have a  
360 minimal effect in melting point depression compared to DMSO solutions. Highest  
361 amount of melting point depression is achieved in the CPA formulation containing 1%  
362 sericin and 100 mM trehalose.

363 When the heat of fusion characteristics of the CPA formulations were compared  
364 to DMSO-water binary solution (Fig. 5C), addition of 100mM trehalose has a large  
365 impact on heat of fusion with 1% DMSO solution. However, for CPA formulations  
366 containing higher concentrations of DMSO, addition of same concentration of trehalose  
367 does not have such appreciable effect. Similar trend is observed in CPA formulation  
368 containing 1% sericin and 100 mM trehalose. CPA formulations containing sericin-water  
369 binary solutions have similar heat of fusion characteristics as DMSO-water based CPA  
370 formulations.

371 As a collaborative effect of trehalose and sericin was observed in DSC  
372 thermograms described above, a DSC study was undertaken with CPA formulations  
373 containing DMSO (5% and 10%) with varying amounts of sericin and 100 mM trehalose.  
374 When sericin concentration is increased from 1 – 5%, a significant increase in freezing  
375 point can be observed in CPA formulations containing both 5% and 10% DMSO (Fig.  
376 6A). Progressive addition of sericin result in marginal but linear increase in melting  
377 point for CPA formulations containing 10% DMSO, whereas in formulations containing  
378 5% DMSO, an opposite trend is observed (Fig. 6B). Heat of fusion values in 5% DMSO  
379 based CPA formulation show a significant reduction initially with increase in sericin  
380 concentration. However, the trend is reversed on further addition of sericin. A similar  
381 trend with lower heat of fusion values is observed in CPA formulations containing 10%  
382 DMSO (Fig. 6C).

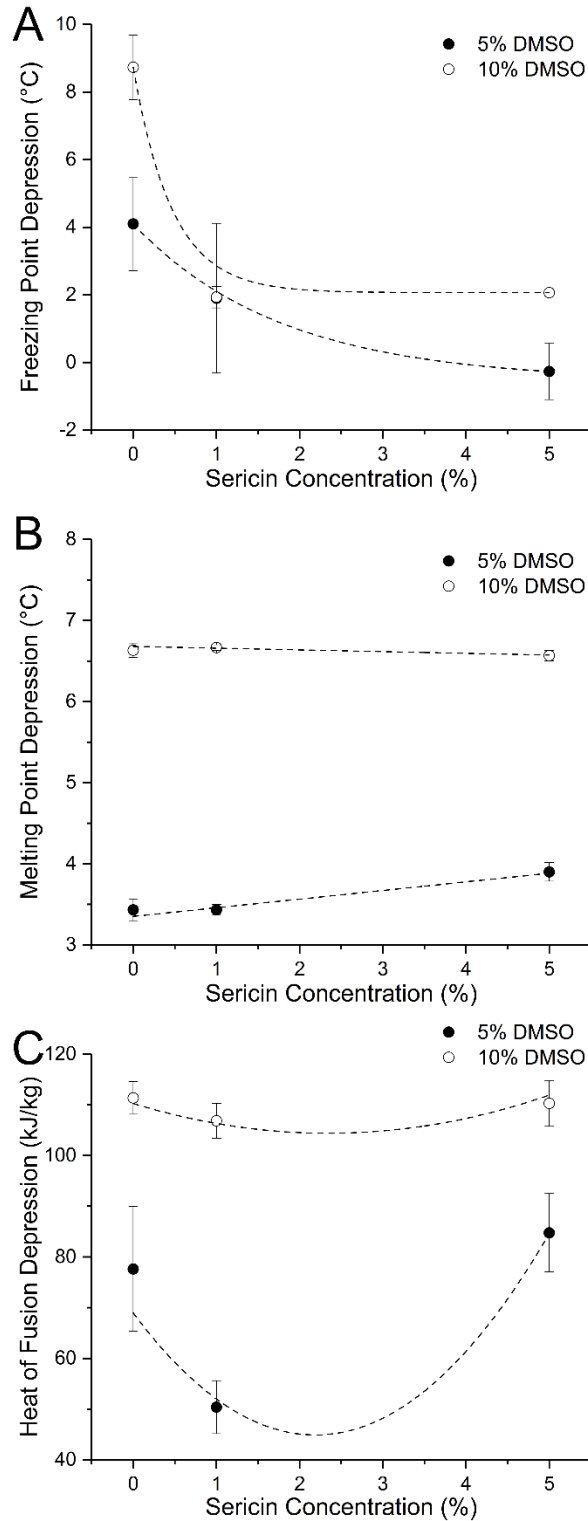

383

384

385

Figure 6: DSC analysis of CPA solutions A) CPA solutions are made with pure water and contain 100 mM trehalose, either 5% or 10% DMSO, and changing

386 concentrations of sericin (0-5% w/v) Freezing point depression is plotted using an  
387 exponential decay function, which decreases with increasing sericin concentration (w/v).  
388 B) Change in sericin concentration has small effect on the change in melting point. C) A  
389 localized drop of heat of fusion depression at 1% sericin is highly pronounced with 5%  
390 DMSO. Error bars show  $\pm$ SEM, n=3

391

392

393 *Membrane Integrity and Growth Patterns of Hepatocarcinoma Cells Following*  
394 *Cryopreservation*

395 Fig. 7A indicates the post-thaw membrane integrity of the HepG2 cells cryo-  
396 processed using different CPA formulations. Membrane integrity for 5% and 10%  
397 DMSO-only cells were 46% and 73%, respectively. The addition of trehalose to the CPA  
398 formulation containing 10% DMSO resulted in increase in membrane integrity. Same  
399 trend is observed in CPA formulation contain 5% DMSO. However, addition of 1%  
400 sericin to CPA formulation containing 10% DMSO solutions without trehalose resulted in  
401 an increase in a 20% increase membrane integrity. No additional gain in membrane  
402 integrity is achieved by increasing the concentration of sericin. For CPA formulation  
403 containing 5% DMSO, addition of 1% sericin results in a similar increase in membrane  
404 integrity. However, addition of 100 mM trehalose to CPA formulations containing 1%  
405 and 5% sericin in 10% DMSO resulted in a decrease of membrane integrity. The same  
406 trend is observed in CPA formulations containing 5% DMSO, where maximum loss of  
407 viability (25%) is observed in solutions containing both 5% sericin and 100 mM  
408 trehalose.

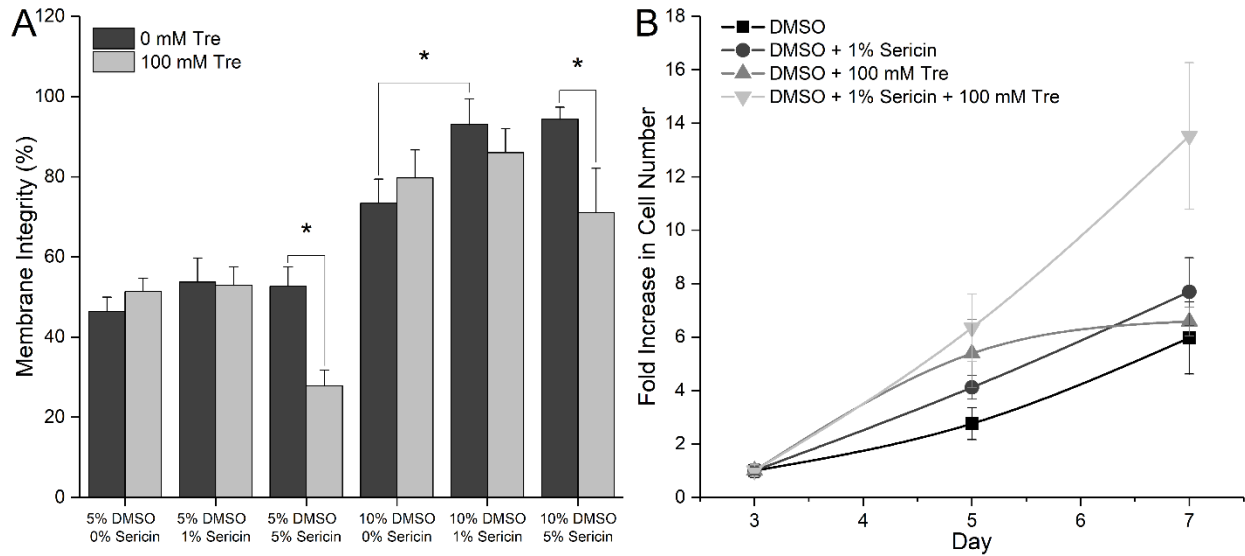

409

410 Figure 7: Health outcomes of mammalian cells for various CPAs A) Immediate

411 membrane integrity for HepG2 cells after freezing for various CPA solutions with and

412 without trehalose. Solutions containing 10% DMSO overall showed higher membrane

413 integrity. B) After thawing, cells grown in parallel were counted for their respective

414 conditions, all having a DMSO concentration of 10% (v/v). Data is displayed as fold

415 increase, normalized to day 3 counts. The solution containing 10% DMSO, 1% sericin,

416 and 100 mM trehalose had the best outcomes. Error bars show  $\pm$ SEM, n=3.

417

418 When cells cryo-processed in CPA formulations containing DMSO and sericin

419 were returned to culture conditions (Fig. 7B), the cells that survived freezing show no

420 negative effects in cell growth (Fig. 7B). The 10% DMSO, 1% sericin, 100 mM trehalose

421 CPA solutions showed the strongest post-thaw growth.

422

423 **Discussion**



424 Interactions with water molecules have been shown to play a crucial role in  
425 regulating the function of biomolecules that are important to maintain cellular function  
426 [43]. Characterization of molecular level interactions is critical for unraveling the  
427 complexities of biological outcomes related to cryopreservation. Such characterization  
428 of CPA formulations in aqueous environment may hold the key to developing low  
429 toxicity cryopreservation solutions that can advance the state of the art in  
430 cryopreservation [7, 44].

431 CPA formulations containing 5–10% DMSO are standard in cryopreservation due  
432 to its ability to recover viable cells following freezing [4, 5, 45]. However, the major  
433 drawback of using DMSO in a CPA formulation is related to strong cytotoxic effects at  
434 physiological temperatures [7, 15, 46]. Recent studies indicate significant cytotoxic  
435 effect even at lower concentrations [6]. Efforts to mitigate cytotoxic effects of DMSO  
436 have been a major driver for using additives such as trehalose, sucrose and proline in  
437 CPA formulations [14, 18, 19, 47]. In this regard, water soluble long-chain polymers  
438 have been explored as CPA additives. Several long-chain polymers have already been  
439 explored as CPA additives due to their ability to reduce intracellular water content by  
440 increasing extracellular osmolality [48] which reduces chances of cellular injury due to  
441 IIF at low temperatures. Various serums, including fetal bovine serum (FBS), have been  
442 used as a source of long-chain proteins in CPA formulations [49]. However, the  
443 undefined nature of the majority of serums, potential presence of endotoxins, viral  
444 toxins, and other xenobiotic components make addition of serum an inherently risky and  
445 unreliable [50].

446 Sericin has been primarily explored as a serum replacement agent in CPA  
447 formulation. Sasaki et al. successfully used sericin as a serum replacing agent to  
448 cryopreserve human dermal fibroblasts, human epidermal keratinocytes, the rat  
449 phaeochromocytoma cell lines [29]. Human adipose tissue-derived stem cells  
450 cryopreserved in CPAs containing 1% sericin along with maltose and 10% DMSO were  
451 shown to have a superior post-thaw viability compared to those cryopreserved in similar  
452 CPAs that replaced sericin with serum [28]. However, no significant differences in the  
453 viability outcome of pancreatic islets was observed between CPA formulations  
454 containing 1% sericin and those containing 10% serum [51]. Bovine embryos  
455 cryopreserved in CPA supplemented with various concentrations (0.1%, 0.5%, and  
456 1.0%) of sericin exhibited similar trends in survival and development to those of  
457 embryos frozen in CPA supplemented with 0.4% bovine serum albumin and 20% fetal  
458 bovine serum.

459 While most of these studies evaluated use of sericin to act as a serum  
460 replacement agent, the current study focuses on characterization of the possible  
461 underlying physico-chemical and thermodynamic effect of presence of sericin in CPA  
462 formulations. These effects were linked to the biological outcome and the knowledge  
463 gained here can be extended to formulate CPA formulations with superior  
464 understanding of the relationship between physico-chemical and thermodynamic  
465 parameters with post-thaw cellular viability. This can lead to the development of CPA  
466 formulations with reduced or no DMSO that has minimal potential to inflict damage in  
467 post-thaw conditions. The effect of addition of sericin in CPA formulation was evaluated  
468 using Raman microspectroscopy and differential scanning calorimetry studies.

469

470 *H-bonding Characteristics:*

471 While the role of H-bonding in modulating cryopreservation outcome is well  
472 accepted [34, 52, 53], there have been very few studies that directly link the H-bonding  
473 characteristics with the contents of CPA formulations. While some molecular dynamic  
474 simulation studies have looked at the effect of presence of CPA components such as  
475 DMSO, ethylene glycol and glycerol on H-bonding [53], experimental verification of the  
476 ability of the CPA components to influence H-bonding with water molecules is lacking.  
477 In the present study, a combined Raman microspectroscopy and DSC based analysis  
478 was undertaken to understand the ability of a sericin to influence H-bonding  
479 characteristics.

480 A number of techniques, including Raman [54], NMR [55], X-ray [56], neutron  
481 diffraction, and femtosecond spectroscopy have been used to study effect of water  
482 molecules to understand associated physico-chemical effect. The Raman  
483 microspectroscopy technique used in this study is an excellent tool to characterize and  
484 quantify the effect of H-bonding at molecular level in an aqueous environment at low  
485 temperatures [19, 57]. The technique was used to characterize and quantify the nature  
486 of the H-bonding network by following changes in constituent peak intensities in the OH  
487 stretching regions in the Raman spectra in presence of sericin at different temperatures.  
488 At lower temperatures the number of symmetrically arranged water clusters having  
489 lower energy forms increase in pure water causing a characteristic increase in intensity  
490 of the symmetric OH stretching peak. The opposite trend is observed for asymmetric  
491 OH stretching peak representing the incomplete water clusters. This observation is

492 consistent with the cluster flickering phenomena described by Frank et al. and can be  
493 quantified by comparing the rate of changes in the increase of decrease of intensities of  
494 symmetric and asymmetric peaks [57, 58]. It was found that at lower temperatures,  
495 presence of sericin influences the ratio described here and at higher sericin  
496 concentrations, it decreases significantly due to decrease of incomplete water clusters  
497 and increase in overall number of strongly H-bonded water clusters. This causes a  
498 fundamental change in overall strength of H-bonding in water clusters in presence of  
499 sericin. Presence of DMSO in water-DMSO binary solutions is known to reduce the  
500 number of incomplete water clusters at lower temperature in similar fashion [59, 60].  
501 Considering the relationship between the number of symmetrically bonded water  
502 clusters and ice crystal formation, this indicates an ability of sericin to modulate ice  
503 crystal formation. This is highly significant given the fact that the number and size of ice  
504 crystal formation have been directly linked to the post-thaw viability outcome in several  
505 studies [19] and indicates the possible role played by sericin as an additive.

506 The effect of presence of sericin on formation of H-bonding in water clusters  
507 were extended to quantify the thermodynamic relationships. Van't Hoff analysis was  
508 used to quantify enthalpy of H-bond formation using the spectral data (Fig. 2B). The  
509 results indicate that the sericin can influence both enthalpy and entropy of solution by  
510 modulating H-bonding interactions with water. The strongest effects were observed at a  
511 sericin concentration of 1% w/v where a difference of over 60% was noticed compared  
512 to pure water. The significant reduction in enthalpy possibly indicates formation of  
513 extensive H-bonding network in presence of 1% sericin. The increased order of the  
514 water clusters in comparison to pure water due to increase in H-bonding will result in a

515 decrease of both entropy and enthalpy as seen in Fig. 2B and C. However, with  
516 increase in sericin concentration, the trend is lost and a possibly indicates increase in  
517 incompletely formed water clusters and this conclusion is supported by spectroscopic  
518 observations indicated in Fig. 1D. change in as indicated by the significant decrease in  
519 both entropy and enthalpy. This is an important aspect that can be used to understand  
520 the critical parameters related to the extracellular environment at lower temperature in  
521 presence of sericin. While DMSO has a similar effect on enthalpy and H-bonding  
522 characteristics, studies indicate an absence of such trends with increasing  
523 concentrations [61, 62]. The overall linear relationship between enthalpy and entropy in  
524 aqueous solutions of sericin (Fig. 2D) in spite of significant depression at 1% w/v  
525 concentration implies a strong trend of entropy-enthalpy compensation. This  
526 compensatory trend of entropy and enthalpy is a classic indicator of involvement of H-  
527 bonding dynamics [63]. This also indicates that the change in H-bonding characteristics  
528 due to presence of sericin may also influence the degree of steric hindrance of the  
529 molecules in the aqueous environment [64]. At a concentration of 1% sericin, a  
530 coordinated decrease in entropy of activation can be achieved with the increased steric  
531 hindrance. However, it is important to note that the degree of steric hindrance caused  
532 by the nature of the H-bonding network in presence of 1% sericin follow the overall  
533 reaction framework defined by the isokinetic line. Furthermore, in such an energetic  
534 framework, the reaction of forming a symmetric bond from asymmetric bond is  
535 significantly more favorable for 1% sericin solution in comparison with solutions  
536 containing higher amount of sericin.

537           Along with the intensities, a shift in peak positions in OH stretching region  
538 indicates the change in energy characteristics of associated water clusters [34]. A shift  
539 towards lower wavenumbers indicate lower energy transition while a shift towards  
540 higher wavenumber is generally associated with transition to higher energy state. The  
541 dynamics related to change in wavenumber of peak positions in OH stretching region in  
542 liquid water is often connected to the reorganization of H-bonding in local solvent  
543 network [65]. However, being a collective phenomenon, it is difficult to quantify the  
544 extent of reorganization in the local H-bonding network. Recent studies indicate that a  
545 linear relationship between the change in wavenumbers of the peaks in OH stretching  
546 region and the charge and energy transfer through donor-acceptor water pairs in water-  
547 clusters. This linearity of a hydrogen bond can be related to the bond stretch frequency  
548 exhibited by its components. Increased hydrogen bonding strength shifts the OH  
549 stretching band toward lower wavenumbers [34]. This shift is noticeably observed  
550 during the formation of ice, when the spectra shifts from a broad OH peak to a sharp  
551 OH band at a much lower wavenumber [66]. Both the symmetric and asymmetric peaks  
552 were found to exhibit a shift towards low wavenumber as temperature decreases. The  
553 ratio of the amount of shift with change in temperature remains approximately  
554 proportional for all solutions tested (Fig. 4A). Interestingly, observed differences  
555 between the solutions only become significant at lower temperatures (Fig. 3C, 3D). This  
556 possibly indicates that sericin actively reduces the energy associated with the H-bonded  
557 water clusters at lower temperatures. While further studies are required to fully  
558 understand the effect of such behavior, it can be said that the rate of energy shift  
559 associated with H-bonded structure is more prominent among the water clusters

560 incompletely bound by H-bonding (Fig. 3B). For solutions containing 1% sericin, the  
561 symmetric and asymmetric peak shifts to the right are significant compared to water,  
562 indicating an overall weakening in bonding strength at low temperatures. These results  
563 agree with the general trend observed in Van't Hoff analysis discussed above.

#### 564 *Thermodynamic analysis of freezing characteristics*

565 Spectroscopic studies were useful in developing an understanding of the  
566 fundamental effect of sericin on H-bonding and the thermodynamic parameters derived  
567 from DSC studies provide valuable insights to relate the concentrations and  
568 compositions of CPA to the post-thaw viability. The slow cooling cryopreservation  
569 technique employed here, extracellular ice nucleation in supercooled condition is guided  
570 by the thermodynamic properties of the individual components of CPA formulation. A  
571 decrease in extracellular ice nucleation has been traditionally linked to the probability of  
572 incidence of generally lethal IIF in multiple studies [4, 48, 67]. Decreasing the nucleation  
573 temperature in extracellular environment is accompanied by an increase in the amount  
574 of intracellular supercooling; thus, separating the effects of temperature and  
575 supercooling can be challenging. Furthermore, increasing the concentrations of the non-  
576 permeating components of CPA formulations generally increase the tonicity of the  
577 extracellular solution and in turn causes the cell volume to decrease and intracellular  
578 osmolality to increase [48]. This decreases the probabilistic incidence of IIF even at  
579 higher degree of supercooling. This may be one of the contributing factors that can  
580 explain the increase in viability observed when certain additives are included in CPA  
581 formulation in addition to traditional permeating CPAs such as DMSO [18, 19].  
582 However, there is a possibility that additives such as trehalose and sericin may have

583 influence the thermodynamic properties of the extracellular solution in a unique way due  
584 to their mutual interaction. When 100 mM trehalose is added to sericin solutions at  
585 different concentrations, a significant loss of freezing point depression trend is observed  
586 (Fig. 5A). In addition to probabilistic decrease of IIF, such increase in freezing point may  
587 also prevent chilling injuries [68]. The collaborative effect of sericin may also have a role  
588 to play in preventing re-crystallization injury. Studies with human oocytes [67] indicate  
589 that post-thaw survival of cells can be maximized and incidence of IIF can be minimized  
590 by raising freezing point close to the melting point of CPA formulation. Sericin on its own  
591 has a similar effect on melting point compared to DMSO, and addition of trehalose  
592 decreases the melting point even further, indicating the combined effects of trehalose  
593 and sericin (Fig. 5B) may achieved better outcomes. Furthermore, the variation in heat  
594 of fusion value can be directly correlated to the difference in the nature of extracellular  
595 ice crystals formed [69]. Even though in a multi-component system, the concept of  
596 latent heat is complicated by the possible internal melting and freezing at microscale  
597 that can happen over a wide temperature range [70], a variation in heat of fusion will  
598 generally indicate a change in the overall quantity of the ice crystals formed [71]. As  
599 seen in Fig. 5C, increasing the concentration of sericin in CPA formulation on its own do  
600 not change the quantity of ice formation at the same freezing rate compared to DMSO.  
601 However, with an addition of 100 mM trehalose the heat of fusion increases indicating a  
602 significant change in the number of the ice formation. This observation is supported by  
603 detailed Raman microspectroscopic study of the nature of the ice crystal formation in  
604 presence of 100 mM trehalose in DMSO solution by Solocinski et al. [19]. Addition of  
605 100 mM trehalose in sericin solution has a similar effect and one can assume similar



606 trends in ice crystal formation as in a DMSO solution containing 100 mM trehalose. This  
607 is another indication of trehalose and sericin can collaboratively modulate the ice  
608 formation phenomena in extracellular environment during cryopreservation.

609 To further investigate the viability of sericin to be used as an additive with the  
610 capability to partially replace DMSO as a CPA component, a detailed DSC study with  
611 CPA formulations containing 5% and 10% DMSO (v/v). While 100 mM trehalose was  
612 maintained as a component, the sericin concentration was varied from 1-5% (w/v).  
613 Freezing point depression characteristics (Fig. 6A) indicate that with reduced DMSO  
614 concentration, sericin can influence the freezing point depression temperature of the  
615 CPA formulation at lower concentration. While a similar trend holds for CPA formulation  
616 containing 10% DMSO, the extent of freezing point depression is higher when  
617 compared to the solution containing lower concentration of DMSO. The difference  
618 between two CPA formulations containing different concentrations of DMSO was more  
619 prominent (Fig. 6B) when it comes to melting point depression characteristics with  
620 solutions containing 5% DMSO having a significantly lower level of melting point  
621 depression characteristics. This underscores the strong influence of DMSO on melting  
622 point depression characteristics in CPA formulations. Finally, the heat of fusion  
623 characteristics of the solutions (Fig. 6C) indicate a significantly different trend in the  
624 number of ice crystal formation. All of these indicate an increased possibility of IIF for  
625 CPA formulations containing 5% DMSO increasing the chances of cellular injury.  
626 However, with the addition of sericin and trehalose as an additive to CPA formulations  
627 with higher DMSO content, there is a chance of increased hyperosmotic exposure and  
628 related solution effects injury.

629 *Cellular Viability and growth:*

630 The membrane integrity of HepG2 cells cryopreserved using the CPA  
631 formulations described here indicate a higher viability of CPA formulations containing  
632 10% DMSO (Fig. 7A). This observation is consistent with increased probability of  
633 intracellular damage due to formation of IIF when CPA formulations containing 5%  
634 DMSO as predicted by the calorimetry studies. While the addition of 100 mM trehalose  
635 to 10% DMSO solution led to an increased membrane integrity in comparison to 10%  
636 DMSO solution, addition of 1% sericin (w/v) to 10% DMSO resulted in a considerable  
637 increase in membrane integrity. Effect of addition of 1% sericin to 10% DMSO solution  
638 was higher than the CPA formulations containing 100 mM trehalose to 10% DMSO  
639 solution. This indicates the superior nature of sericin as an additive. While the  
640 thermogravimetric studies indicate distinct synergistic advantages of using both  
641 trehalose and sericin as an additive in 10% DMSO solution, the membrane integrity  
642 data indicate a 5% decrease, possibility due to increased hyperosmotic exposure and  
643 solution effects injury [48, 72]. However, it is important to note that even though the  
644 HepG2 cells that were cryopreserved using both trehalose and sericin has lower  
645 membrane integrity, their growth pattern was significantly better compared to other  
646 groups. This possibly indicate superior ability to protect the cells under post-thaw culture  
647 conditions. Further studies are underway to investigate possible protective  
648 cytoprotective effect of sericin as an additive to CPA formulation.

649 **Conclusion**

650 The data presented here indicates that sericin at right concentration can play an  
651 important role as an effective additive in CPA formulations. While the usefulness of

652 polymeric proteins in replacing DMSO in CPA formulation has been established, the  
653 study presented here provides important insight to how sericin impacts the H-bonding  
654 network and thermophysical properties of the CPA formulation during cryopreservation  
655 and provides a practical approach towards using sericin in CPA formulation as an  
656 additive to ameliorate post-thaw injuries in culture condition. While the prospect of using  
657 sericin as a replacement for DMSO in CPAs is highly attractive, further research is  
658 required to transform this study into a clinically viable CPA solution.

## 659 **Author Contributions**

660 **Conceptualization** NC

661 **Data Curation** LU, JS, NC

662 **Formal Analysis** LU, JS, NC

663 **Funding Acquisition** QO, NC

664 **Investigation** LU, ER

665 **Methodology** LU, ER

666 **Project Administration** QO, NC

667 **Resources** QO, NC

668 **Software** LU

669 **Supervision** QO, NC

670 **Visualization** LU, JS, ER, NC

671 **Writing – Original Draft Preparation** LU, NC

672 **Writing – Review & Editing** LU, JS, QO, NC

## 673 **Acknowledgements**

674 Authors would like to acknowledge the NSF grant numbers CHE 1609440 and 1820032  
675 Authors would also like to acknowledge instrumentation support through the startup  
676 funding received from CECS at University of Michigan-Dearborn and UM Grant  
677 Numbers U046888. NC has a financial interest in Otzi Bio LLC, a company focused on  
678 developing biopreservation technology. NC interests are managed by the University of  
679 Michigan in accordance with their conflict-of-interest policies.

## 680 **References**

- 681
- 682 1. Chang, Z.H. and J.G. Baust, *Physical aging of glassy state: DSC study of vitrified*  
683 *glycerol systems*. *Cryobiology*, 1991. **28**(1): p. 87-95.
  - 684 2. Benson, E.E., *Cryopreservation theory*, in *Plant cryopreservation: a practical guide*.  
685 2008, Springer. p. 15-32.
  - 686 3. Hancock, B.C., S.L. Shamblin, and G. Zografi, *Molecular mobility of amorphous*  
687 *pharmaceutical solids below their glass transition temperatures*. *Pharmaceutical*  
688 *research*, 1995. **12**(6): p. 799-806.
  - 689 4. Mazur, P., *Life in the frozen state*. Principles of Cryobiology. CRC Press, Boca Raton,  
690 FL, USA. Academic Press. Boca Raton, 2004: p. 3-65.
  - 691 5. Pegg, D.E., *-Principles of Cryopreservation*, in *PreservAtion of HumAn oocytes*. 2009,  
692 CRC Press. p. 34-46.
  - 693 6. Galvao, J., et al., *Unexpected low-dose toxicity of the universal solvent DMSO*. *The*  
694 *FASEB Journal*, 2014. **28**(3): p. 1317-1330.
  - 695 7. Fahy, G.M., *The relevance of cryoprotectant "toxicity" to cryobiology*. *Cryobiology*, 1986.  
696 **23**(1): p. 1-13.

- 697 8. Rowley, S. and G. Anderson, *Effect of DMSO exposure without cryopreservation on*  
698 *hematopoietic progenitor cells*. Bone marrow transplantation, 1993. **11**(5): p. 389-393.
- 699 9. Notman, R., et al., *Molecular basis for dimethylsulfoxide (DMSO) action on lipid*  
700 *membranes*. Journal of the American Chemical Society, 2006. **128**(43): p. 13982-13983.
- 701 10. Marren, K., *Dimethyl sulfoxide: an effective penetration enhancer for topical*  
702 *administration of NSAIDs*. The Physician and sportsmedicine, 2011. **39**(3): p. 75-82.
- 703 11. Mannan, A., et al., *DMSO triggers the generation of ROS leading to an increase in*  
704 *artemisinin and dihydroartemisinic acid in Artemisia annua shoot cultures*. Plant cell  
705 reports, 2010. **29**(2): p. 143-152.
- 706 12. Yuan, C., et al., *Dimethyl sulfoxide damages mitochondrial integrity and membrane*  
707 *potential in cultured astrocytes*. PloS one, 2014. **9**(9): p. e107447.
- 708 13. Verheijen, M., et al., *DMSO induces drastic changes in human cellular processes and*  
709 *epigenetic landscape in vitro*. Scientific reports, 2019. **9**(1): p. 4641.
- 710 14. Rudolph, A.S. and J.H. Crowe, *Membrane stabilization during freezing: the role of two*  
711 *natural cryoprotectants, trehalose and proline*. Cryobiology, 1985. **22**(4): p. 367-377.
- 712 15. Anchordoguy, T.J., et al., *Modes of interaction of cryoprotectants with membrane*  
713 *phospholipids during freezing*. Cryobiology, 1987. **24**(4): p. 324-331.
- 714 16. Rodrigues, J., et al., *Evaluation of trehalose and sucrose as cryoprotectants for*  
715 *hematopoietic stem cells of umbilical cord blood*. Cryobiology, 2008. **56**(2): p. 144-151.
- 716 17. Stokich, B., et al., *Cryopreservation of hepatocyte (HepG2) cell monolayers: Impact of*  
717 *trehalose*. Cryobiology, 2014. **69**(2): p. 281-290.
- 718 18. Bailey, T.L., et al., *Protective effects of osmolytes in cryopreserving adherent*  
719 *neuroblastoma (Neuro-2a) cells*. Cryobiology, 2015. **71**(3): p. 472-480.
- 720 19. Solocinski, J., et al., *Effect of trehalose as an additive to dimethyl sulfoxide solutions on*  
721 *ice formation, cellular viability, and metabolism*. Cryobiology, 2017. **75**: p. 134-143.

- 722 20. Fowler, A. and M. Toner, *Cryo-injury and biopreservation*. Annals of the New York  
723 Academy of Sciences, 2006. **1066**(1): p. 119-135.
- 724 21. Gao, D. and J. Critser, *Mechanisms of cryoinjury in living cells*. ILAR journal, 2000.  
725 **41**(4): p. 187-196.
- 726 22. Yang, J., et al., *Exploring the Potential of Biocompatible Osmoprotectants as Highly*  
727 *Efficient Cryoprotectants*. ACS applied materials & interfaces, 2017. **9**(49): p. 42516-  
728 42524.
- 729 23. Zhang, J.-M., et al., *Is caspase inhibition a valid therapeutic strategy in cryopreservation*  
730 *of ovarian tissue?* Journal of assisted reproduction and genetics, 2009. **26**(7): p. 415.
- 731 24. Henry, L., et al., *Supplementation of transport and freezing media with anti-apoptotic*  
732 *drugs improves ovarian cortex survival*. Journal of ovarian research, 2016. **9**(1): p. 4.
- 733 25. Zhang, Y.-Q., *Applications of natural silk protein sericin in biomaterials*. Biotechnology  
734 advances, 2002. **20**(2): p. 91-100.
- 735 26. Dash, R., et al., *Antioxidant potential of silk protein sericin against hydrogen peroxide-*  
736 *induced oxidative stress in skin fibroblasts*. BMB reports, 2008. **41**(3): p. 236-241.
- 737 27. Zhaorigetu, S., et al., *Supplemental silk protein, sericin, suppresses colon tumorigenesis*  
738 *in 1, 2-dimethylhydrazine-treated mice by reducing oxidative stress and cell proliferation*.  
739 Bioscience, biotechnology, and biochemistry, 2001. **65**(10): p. 2181-2186.
- 740 28. Miyamoto, Y., et al., *Cryopreservation of human adipose tissue-derived stem/progenitor*  
741 *cells using the silk protein sericin*. Cell transplantation, 2012. **21**(2-3): p. 617-622.
- 742 29. Sasaki, M., et al., *Development of a novel serum-free freezing medium for mammalian*  
743 *cells using the silk protein sericin*. Biotechnology and applied biochemistry, 2005. **42**(2):  
744 p. 183-188.
- 745 30. Miyagi-Shiohira, C., et al., *Cryopreservation of adipose-derived mesenchymal stem*  
746 *cells*. Cell Medicine, 2015. **8**(1-2): p. 3-7.

- 747 31. Aramwit, P., T. Siritientong, and T. Srichana, *Potential applications of silk sericin, a*  
748 *natural protein from textile industry by-products*. Waste Management & Research, 2012.  
749 **30**(3): p. 217-224.
- 750 32. Meneghel, J., et al., *Physical events occurring during the cryopreservation of*  
751 *immortalized human T cells*. PloS one, 2019. **14**(5): p. e0217304.
- 752 33. Wang, R., C. Pellerin, and O. Lebel, *Role of hydrogen bonding in the formation of*  
753 *glasses by small molecules: a triazine case study*. Journal of Materials Chemistry, 2009.  
754 **19**(18): p. 2747-2753.
- 755 34. Dashnau, J.L., et al., *Hydrogen bonding and the cryoprotective properties of*  
756 *glycerol/water mixtures*. The Journal of Physical Chemistry B, 2006. **110**(27): p. 13670-  
757 13677.
- 758 35. Kauppinen, J.K., et al., *Fourier transforms in the computation of self-deconvoluted and*  
759 *first-order derivative spectra of overlapped band contours*. Analytical Chemistry, 1981.  
760 **53**(9): p. 1454-1457.
- 761 36. Starzak, M. and M. Mathlouthi, *Cluster composition of liquid water derived from laser-*  
762 *Raman spectra and molecular simulation data*. Food Chemistry, 2003. **82**(1): p. 3-22.
- 763 37. Sun, Q., *Local statistical interpretation for water structure*. Chemical Physics Letters,  
764 2013. **568**: p. 90-94.
- 765 38. Paolantoni, M., et al., *Tetrahedral ordering in water: Raman profiles and their*  
766 *temperature dependence*. The Journal of Physical Chemistry A, 2009. **113**(52): p.  
767 15100-15105.
- 768 39. Smith, J.D., et al., *Unified description of temperature-dependent hydrogen-bond*  
769 *rearrangements in liquid water*. Proceedings of the National Academy of Sciences, 2005.  
770 **102**(40): p. 14171-14174.
- 771 40. Carey, D.M. and G.M. Korenowski, *Measurement of the Raman spectrum of liquid water*.  
772 The Journal of chemical physics, 1998. **108**(7): p. 2669-2675.

- 773 41. ASTM, E., 968, *Standard Practice for Heat Flow Calibration of Differential Scanning*  
774 *Calorimeters*, American Society for Testing and Materials, Philadelphia. PA. USA.
- 775 42. Hunter, K.M., F.A. Shakib, and F. Paesani, *Disentangling Coupling Effects in the Infrared*  
776 *Spectra of Liquid Water*. The Journal of Physical Chemistry B, 2018. **122**(47): p. 10754-  
777 10761.
- 778 43. Muncan, J. and R. Tsenkova, *Aquaphotomics—From Innovative Knowledge to*  
779 *Integrative Platform in Science and Technology*. Molecules, 2019. **24**(15): p. 2742.
- 780 44. Fahy, G.M., *Cryoprotectant toxicity neutralization*. Cryobiology, 2010. **60**(3,  
781 Supplement): p. S45-S53.
- 782 45. Saragusty, J. and A. Arav, *Current progress in oocyte and embryo cryopreservation by*  
783 *slow freezing and vitrification*. Reproduction, 2011. **141**(1): p. 1-19.
- 784 46. Anchordoguy, T., et al., *Temperature-dependent perturbation of phospholipid bilayers by*  
785 *dimethylsulfoxide*. Biochimica et Biophysica Acta (BBA)-Biomembranes, 1992. **1104**(1):  
786 p. 117-122.
- 787 47. Petrenko, Y.A., D. Jones, and A.Y. Petrenko, *Cryopreservation of human fetal liver*  
788 *hematopoietic stem/progenitor cells using sucrose as an additive to the cryoprotective*  
789 *medium*. Cryobiology, 2008. **57**(3): p. 195-200.
- 790 48. Muldrew, K., et al., *The water to ice transition: implications for living cells*, in *Life in the*  
791 *frozen state*. 2004, CRC Press. p. 93-134.
- 792 49. Son, J.H., et al., *Optimization of cryoprotectants for cryopreservation of rat hepatocyte*.  
793 *Biotechnology Letters*, 2004. **26**(10): p. 829-833.
- 794 50. Hunter, N., et al., *Transmission of prion diseases by blood transfusion*. Journal of  
795 *General Virology*, 2002. **83**(11): p. 2897-2905.
- 796 51. Ohnishi, K., et al., *Effect of the silk protein sericin on cryopreserved rat islets*. Journal of  
797 *Hepato-Biliary-Pancreatic Sciences*, 2012. **19**(4): p. 354-360.



- 798 52. Franks, F., *Solute—Water interactions: Do polyhydroxy compounds alter the properties*  
799 *of water?* Cryobiology, 1983. **20**(3): p. 335-345.
- 800 53. Weng, L., et al., *Molecular Dynamics Study of Effects of Temperature and Concentration*  
801 *on Hydrogen-Bond Abilities of Ethylene Glycol and Glycerol: Implications for*  
802 *Cryopreservation.* The Journal of Physical Chemistry A, 2011. **115**(18): p. 4729-4737.
- 803 54. Zhou, L., T.P. Mernagh, and C. Le Losq, *Observation of the Chemical Structure of Water*  
804 *up to the Critical Point by Raman Spectroscopic Analysis of Fluid Inclusions.* The  
805 Journal of Physical Chemistry B, 2019. **123**(27): p. 5841-5847.
- 806 55. Rönöls, J., et al., *Inter-residual Hydrogen Bonding in Carbohydrates Unraveled by*  
807 *NMR Spectroscopy and Molecular Dynamics Simulations.* ChemBioChem. **0**(0).
- 808 56. Niskanen, J., et al., *Compatibility of quantitative X-ray spectroscopy with continuous*  
809 *distribution models of water at ambient conditions.* Proceedings of the National Academy  
810 of Sciences, 2019. **116**(10): p. 4058-4063.
- 811 57. Sun, Q., *The Raman OH stretching bands of liquid water.* Vibrational Spectroscopy,  
812 2009. **51**(2): p. 213-217.
- 813 58. Frank, H.S. and W.-Y. Wen, *Ion-solvent interaction. Structural aspects of ion-solvent*  
814 *interaction in aqueous solutions: a suggested picture of water structure.* Discussions of  
815 the Faraday Society, 1957. **24**(0): p. 133-140.
- 816 59. Postorino, P., et al., *The interatomic structure of water at supercritical temperatures.*  
817 Nature, 1993. **366**(6456): p. 668-670.
- 818 60. Dolenko, T.A., et al., *Raman spectroscopy of water–ethanol solutions: the estimation of*  
819 *hydrogen bonding energy and the appearance of clathrate-like structures in solutions.*  
820 The Journal of Physical Chemistry A, 2015. **119**(44): p. 10806-10815.
- 821 61. Matsui, T., L.G. Hepler, and D.V. Fenby, *Thermodynamic investigation of complex*  
822 *formation by hydrogen bonding in binary liquid systems. Chloroform with triethylamine,*

- 823            *dimethyl sulfoxide, and acetone*. The Journal of Physical Chemistry, 1973. **77**(20): p.  
824            2397-2400.
- 825    62.    Krishnan, C. and H.L. Friedman, *Solvation enthalpies of various nonelectrolytes in water,*  
826            *propylene carbonate, and dimethyl sulfoxide*. The Journal of Physical Chemistry, 1969.  
827            **73**(5): p. 1572-1580.
- 828    63.    Dunitz, J.D., *Win some, lose some: enthalpy-entropy compensation in weak*  
829            *intermolecular interactions*. Chemistry & biology, 1995. **2**(11): p. 709-712.
- 830    64.    Leffler, J.E., *THE ENTHALPY-ENTROPY RELATIONSHIP AND ITS IMPLICATIONS*  
831            *FOR ORGANIC CHEMISTRY*. The Journal of Organic Chemistry, 1955. **20**(9): p. 1202-  
832            1231.
- 833    65.    Ojha, D., A. Henao, and T.D. Kühne, *Nuclear quantum effects on the vibrational*  
834            *dynamics of liquid water*. The Journal of chemical physics, 2018. **148**(10): p. 102328.
- 835    66.    Sivakumar, T., S.A. Rice, and M.G. Sceats, *Raman spectroscopic studies of the OH*  
836            *stretching region of low density amorphous solid water and of polycrystalline ice Ih*. The  
837            Journal of Chemical Physics, 1978. **69**(8): p. 3468-3476.
- 838    67.    Trad, F.S., M. Toner, and J.D. Biggers, *Effects of cryoprotectants and ice-seeding*  
839            *temperature on intracellular freezing and survival of human oocytes*. Human  
840            Reproduction, 1999. **14**(6): p. 1569-1577.
- 841    68.    Fahy, G.M., et al., *Cellular injury associated with organ cryopreservation: chemical*  
842            *toxicity and cooling injury*. Cell biology of trauma, 1995: p. 333-356.
- 843    69.    Mehl, P.M., *Nucleation and crystal growth in a vitrification solution tested for organ*  
844            *cryopreservation by vitrification*. Cryobiology, 1993. **30**(5): p. 509-518.
- 845    70.    Maykut, G.A. and N. Untersteiner, *Some results from a time-dependent thermodynamic*  
846            *model of sea ice*. Journal of Geophysical Research, 1971. **76**(6): p. 1550-1575.

- 847 71. Flores, A. and H. Goff, *Ice crystal size distributions in dynamically frozen model solutions*  
848 *and ice cream as affected by stabilizers*. Journal of Dairy Science, 1999. **82**(7): p. 1399-  
849 1407.
- 850 72. Meryman, H., R. Williams, and M.S.J. Douglas, *Freezing injury from "solution effects"*  
851 *and its prevention by natural or artificial cryoprotection*. Cryobiology, 1977. **14**(3): p. 287-  
852 302.
- 853
